# Supplementary material for: Tailoring neoadjuvant chemotherapy for a pregnant patient diagnosed with IB2 squamous cervical carcinoma
Source: PubMed Central journal article supplement — Gynecol Oncol Rep. 2024 Oct 16;56:101532. doi: 10.1016/j.gore.2024.101532 (PMC11532939; doi:10.1016/j.gore.2024.101532), 2024-10-16

Supplementary Figure 1. MRI and US after chemotherapy treatment (Archive of University Hospital Kralovske

Vinohrady)

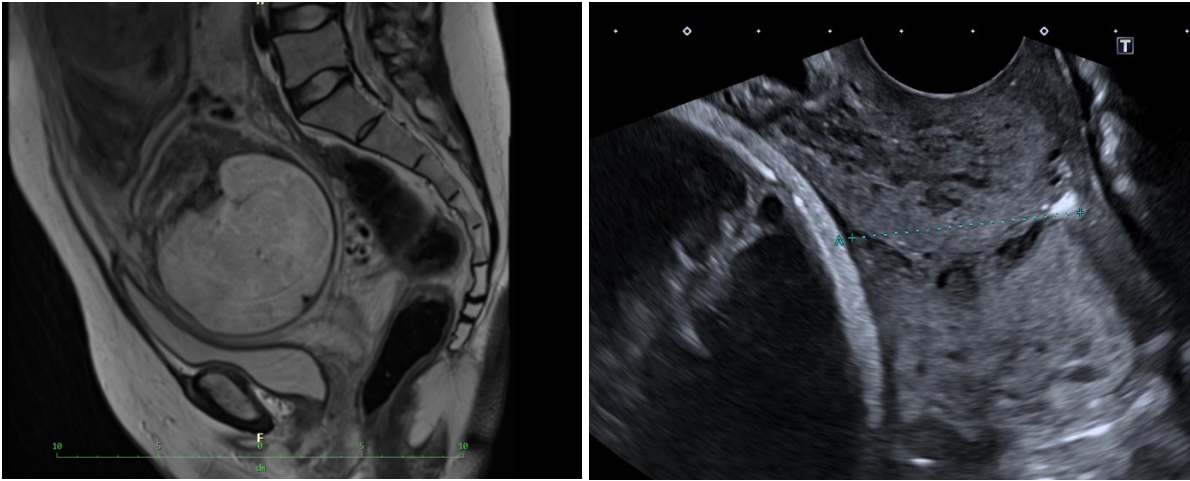

Supplement: mmc1.pdf [file mmc1.pdf]
