# Supplementary material for: Tailoring neoadjuvant chemotherapy for a pregnant patient diagnosed with IB2 squamous cervical carcinoma
Source: PubMed Central journal article supplement — Gynecol Oncol Rep. 2024 Oct 16;56:101532. doi: 10.1016/j.gore.2024.101532 (PMC11532939; doi:10.1016/j.gore.2024.101532), 2024-10-16

*Supplementary Figure 2. Colposcopy after treatment (Archive of University Hospital Kralovske Vinohrady)*

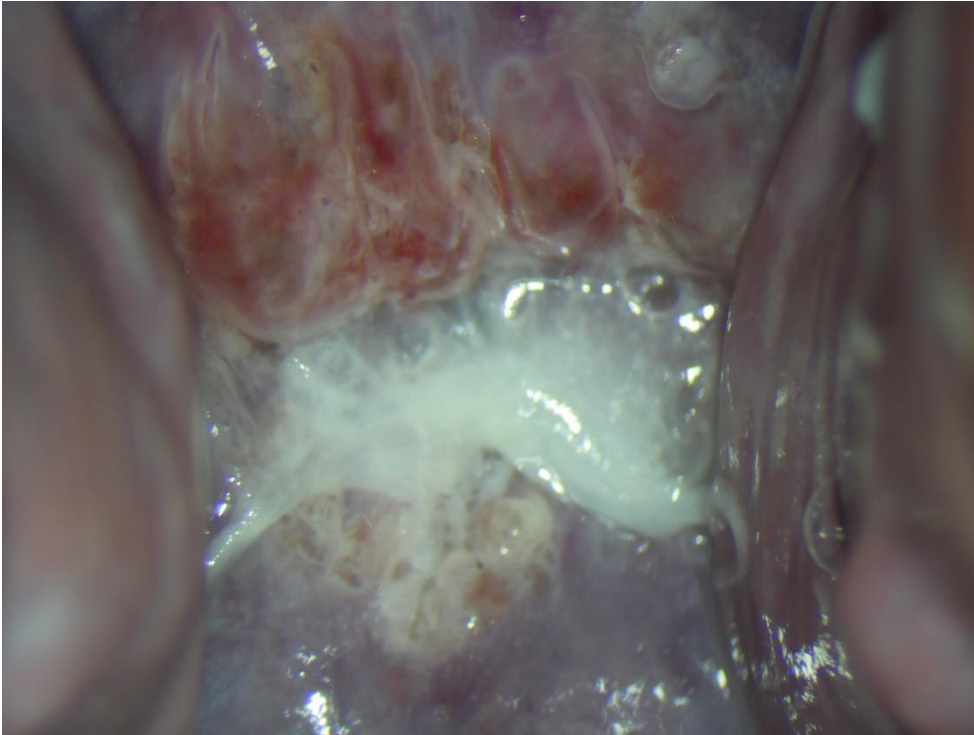

Supplement: mmc2.pdf [file mmc2.pdf]
